# Supplementary material for: An Odorant Binding Protein (SaveOBP9) Involved in Chemoreception of the Wheat Aphid Sitobion avenae
Source: PubMed Central journal article supplement (PMC7664216; doi:10.3390/ijms21218331), 2020-11-06
Supplement: ijms-21-08331-s001.pdf [file ijms-21-08331-s001.pdf]

**Table S1** The primers used in the RT-PCR, qRT-PCR and dsRNA synthesis and protein expression.

| <b>Primer</b>                                               | <b>Primer sequences (5 to 3')</b>                          |
|-------------------------------------------------------------|------------------------------------------------------------|
| <b>For qRT-PCR</b>                                          |                                                            |
| SaveOBP9-F                                                  | ACCTGCGAAGTTCCTCGAAT                                       |
| SaveOBP9-R                                                  | GTTCTTTCAGTGCTGGCGAT                                       |
| <b>For dsRNA synthesis</b>                                  |                                                            |
| SaveOBP9-F                                                  | <i>TAATACGACTCACTATAGGATGATAATCAAAAAGACGTTGTTG</i>         |
| SaveOBP9-R                                                  | <i>TAATACGACTCACTATAGGTTATTTTCGATTTTGGTTTCATCTTC</i>       |
| GFP-F                                                       | <i>TAATACGACTCACTATAGGAAGGGCGAGGAGCTGTTACCCG</i>           |
| GFP-R                                                       | <i>TAATACGACTCACTATAGGCAGCAGGACCATGTGATCGCGC</i>           |
| <b>Actin gene</b>                                           |                                                            |
| β-Actin-F                                                   | CGTTACCAACTGGGACGATATG                                     |
| β-Actin-R                                                   | GGGTTCAATGGAGCTTCTGTTA                                     |
| <b>For protein expression</b>                               |                                                            |
| <b>CSP8</b>                                                 |                                                            |
| SaveOBP9-F                                                  | C <u>GGGATCC</u> GCTGATGATGCAGATGCAGG                      |
| SaveOBP9-R                                                  | CCG <u>CTCGAG</u> TTATTTTCGATTTTGGTTTCATCTTC               |
| F, Forward R, Reverse,<br>GFP, Green Fluorescent<br>Protein | Restriction sites are underlined<br>T7 Promoter are italic |

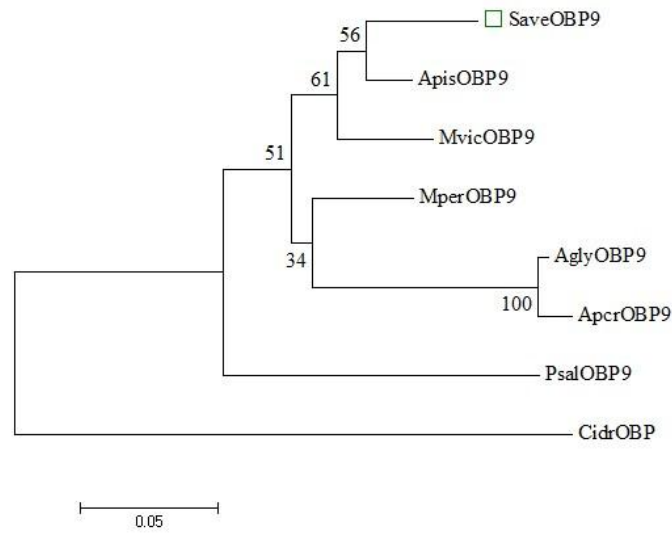

**Figure S1** Evolutionary tree of SaveOBP9 and eight sequences of CSPs from various hemipteran insect species. SaveOBP9 is denoted as box in the tree. The other insect species are; *Megoura viciae* (Mvic), *Acyrtosiphon pisum* (Apis), *Myzus persicae* (Mper), *Aphis glycines* (Agly), *Pterocomma salicis* (Psal), *Aphis craccivora* (Apcr), *Cinara cedri* (cidr). Gene Bank accession number of all OBPs genes are MvicOBP9 AXE72026.1; ApisOBP9, NP\_001153535.1; MperOBP9; AglyOBP9, AHJ80895.1; PsalOBP9, CAR85663.1; ApcrOBP9, KAF0764719.1; CidrOBP, VVC45546.1.
